# Supplementary material for: The role of cation and anion dopant incorporated into a ZnO electron transporting layer for polymer bulk heterojunction solar cells
Source: Royal Society of Chemistry journal article supplement (doi:10.1039/c9ra06974g), 2019-01-01
Supplement: c9ra06974g1.pdf [file c9ra06974g1.pdf]

## Supporting Information

### The role of cation and anion dopant incorporated in a ZnO electron transporting layer for polymer bulk heterojunction solar cells

Soyeon Kim,<sup>a</sup> Jae Hoon Jeong,<sup>a</sup> Quoc Viet Hoang,<sup>b</sup> Joo Won Han,<sup>c</sup> Yong Hyun Kim,<sup>c</sup> Adi prasetio,<sup>a,c</sup>, Muhammad Jahandar,<sup>a</sup> Shinuk Cho<sup>d,\*</sup> and Dong Chan Lim<sup>a,\*</sup>

<sup>a</sup>Surface Technology Division, Korea Institute of Materials Science (KIMS), 797 Changwondaero, Seongsang-gu, Changwon, Gyeongnam 51508, Republic of Korea.

<sup>b</sup>Vietnam-Korea Technological Innovation Center, Directorate for Standards, Metrology and Quality (STAMEQ), No.8 Hoang Quoc Viet, Cau Giay, Ha Noi, Vietnam

<sup>c</sup>Department of Display Engineering, Pukyong National University, Busan 48513, Republic of Korea.

<sup>d</sup>Department of Physics and EHSRC, University of Ulsan, Ulsan 44610, Republic of Korea.

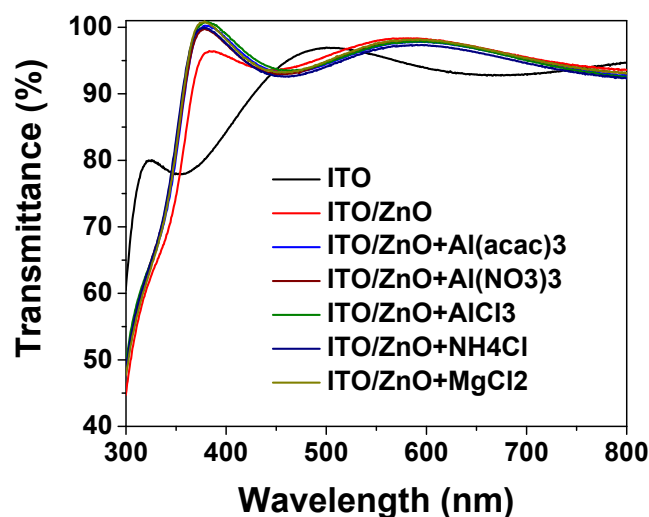

**Figure S1.** Optical transmittance spectra of different interlayers on a glass substrate and a lone glass substrate

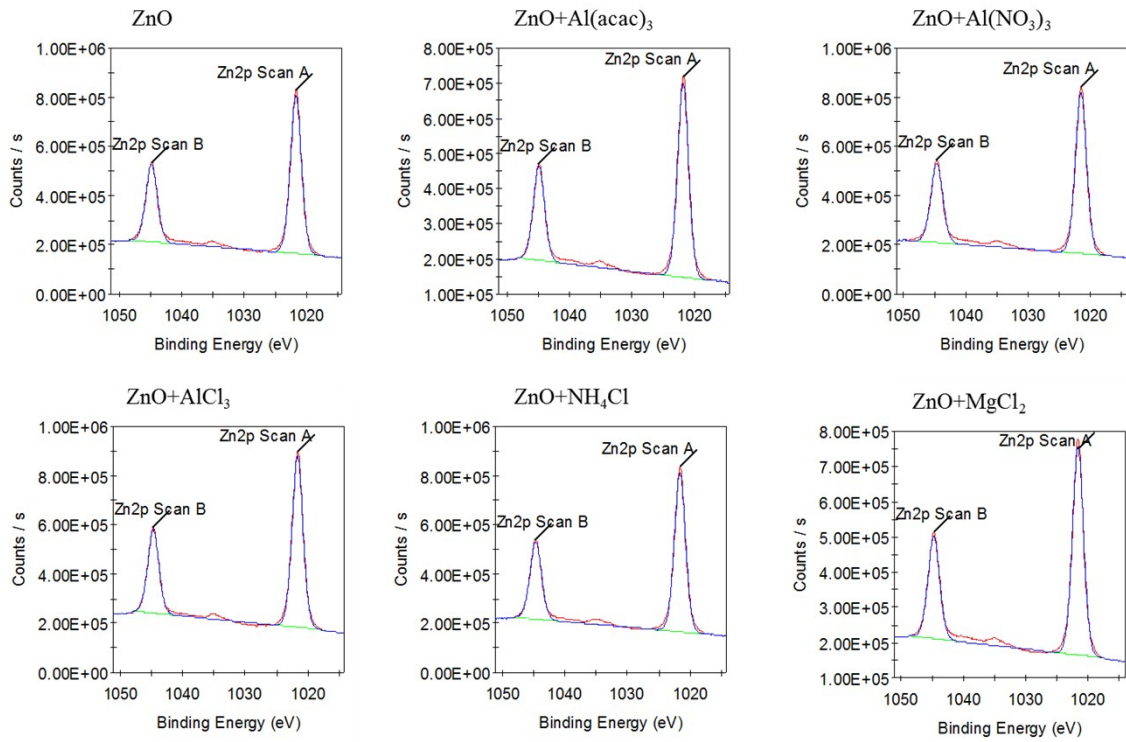

**Figure S2.** High-resolution XPS spectra of Zn 2p peaks of ZnO and doped ZnO layers on a silicon wafer

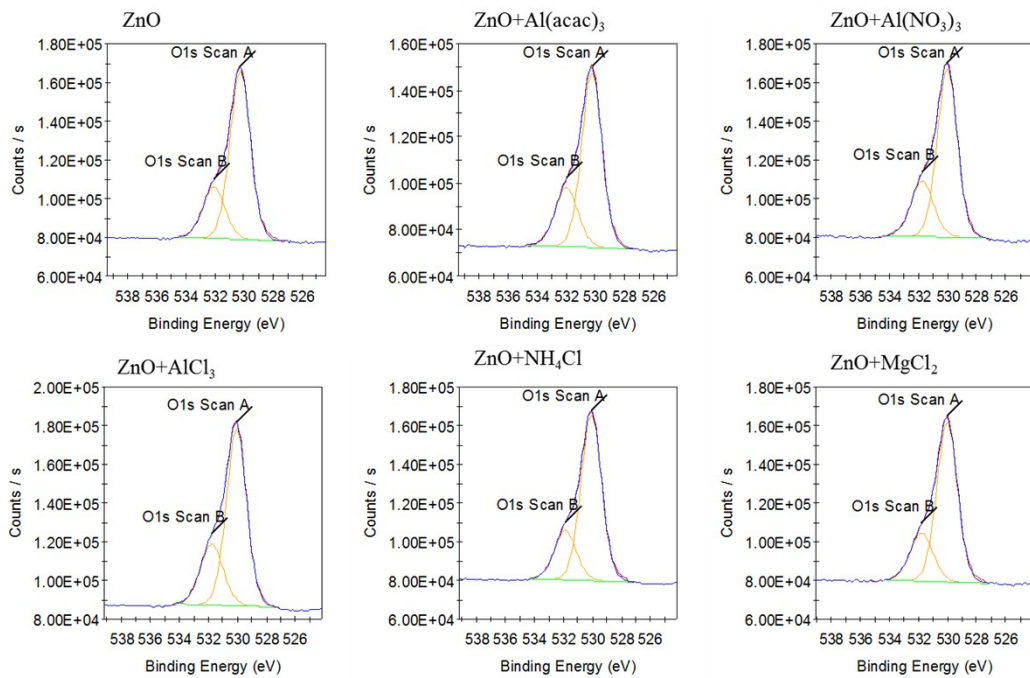

**Figure S3.** High-resolution XPS spectra of O 1s peaks of ZnO and doped ZnO layers on a silicon wafer

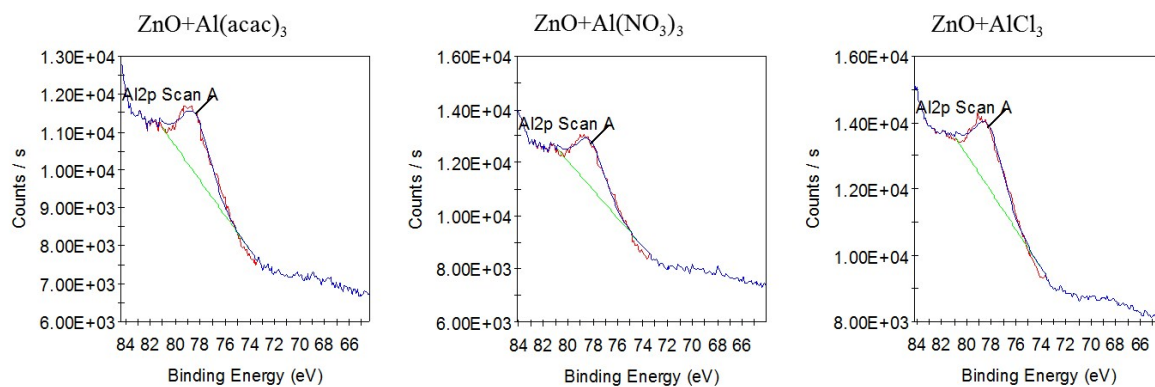

**Figure S4.** High-resolution XPS spectra of Al 2p peaks of doped ZnO thin films on a silicon wafer

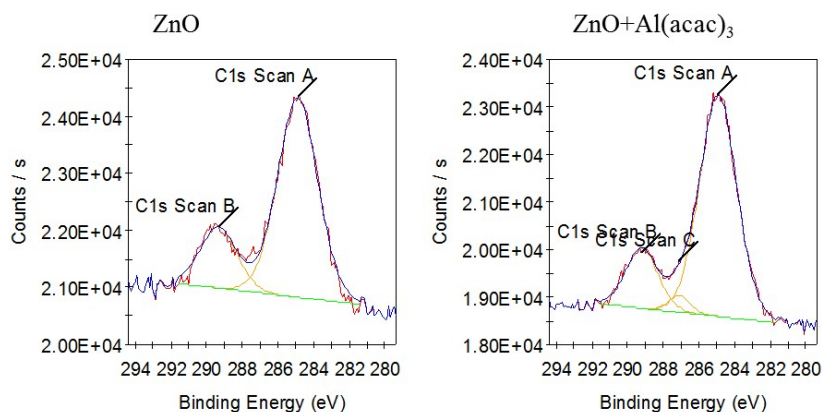

**Figure S5.** High-resolution XPS spectra of C 1s peaks of ZnO and Al(acac)<sub>3</sub>-doped ZnO thin films on a silicon wafer

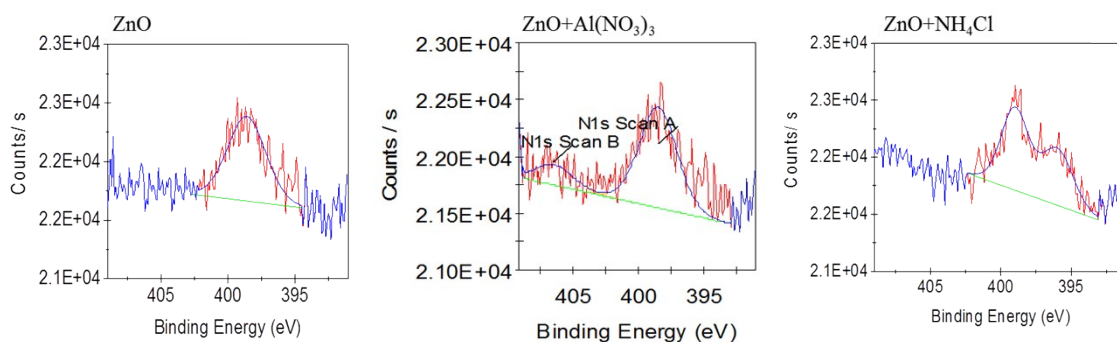

**Figure S6.** High-resolution XPS spectra of N 1s peaks of ZnO and doped ZnO thin films on a silicon wafer

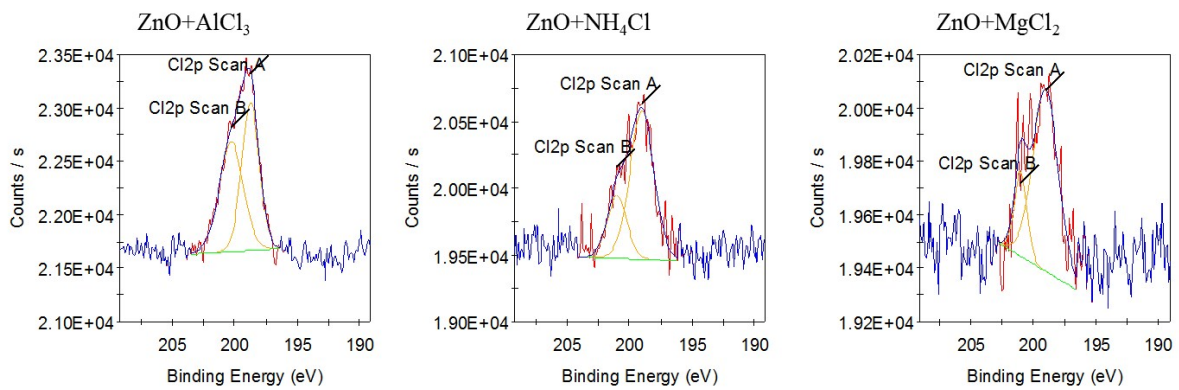

**Figure S7.** High-resolution XPS spectra of Cl 2p peaks of doped ZnO thin films on a silicon wafer

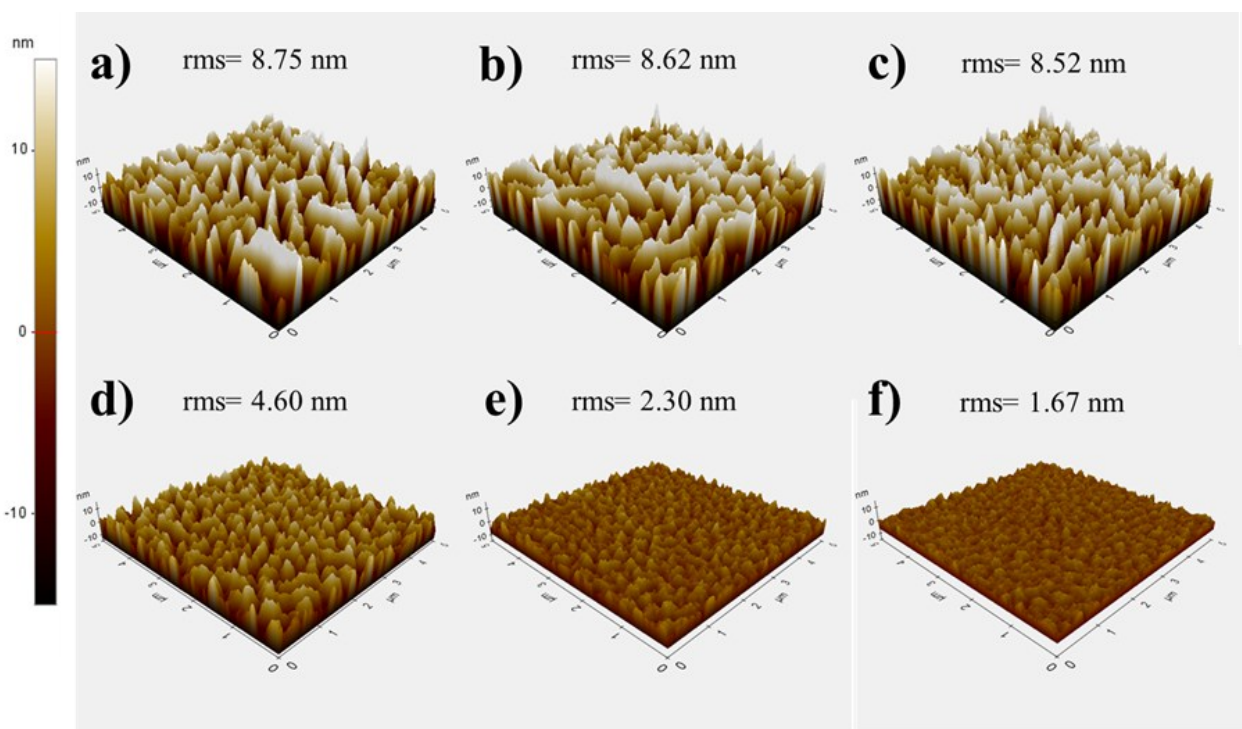

**Figure S8:** 3D AFM tapping-mode height images (5 μm x 5 μm) of a) ITO/ZnO; b) ITO/ZnO+Al(acac)<sub>3</sub>; c) ITO/ZnO+Al(NO<sub>3</sub>)<sub>3</sub>; d) ITO/ZnO+AlCl<sub>3</sub>; e) ITO/ZnO+NH<sub>4</sub>Cl; f) ITO/ZnO+MgCl<sub>2</sub>

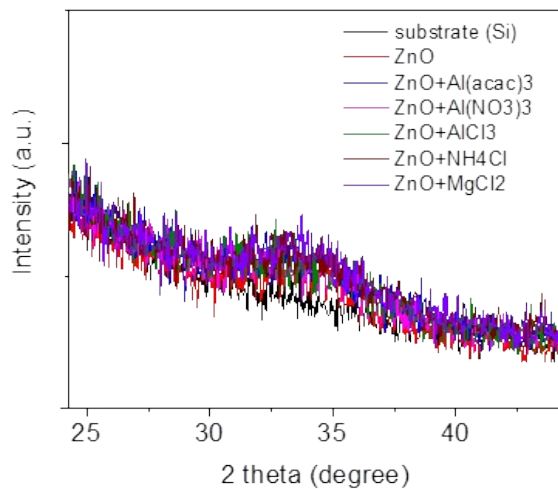

**Figure S9.** XRD of ZnO and doped ZnO thin films on a silicon wafer (annealing temperature: 180 °C)

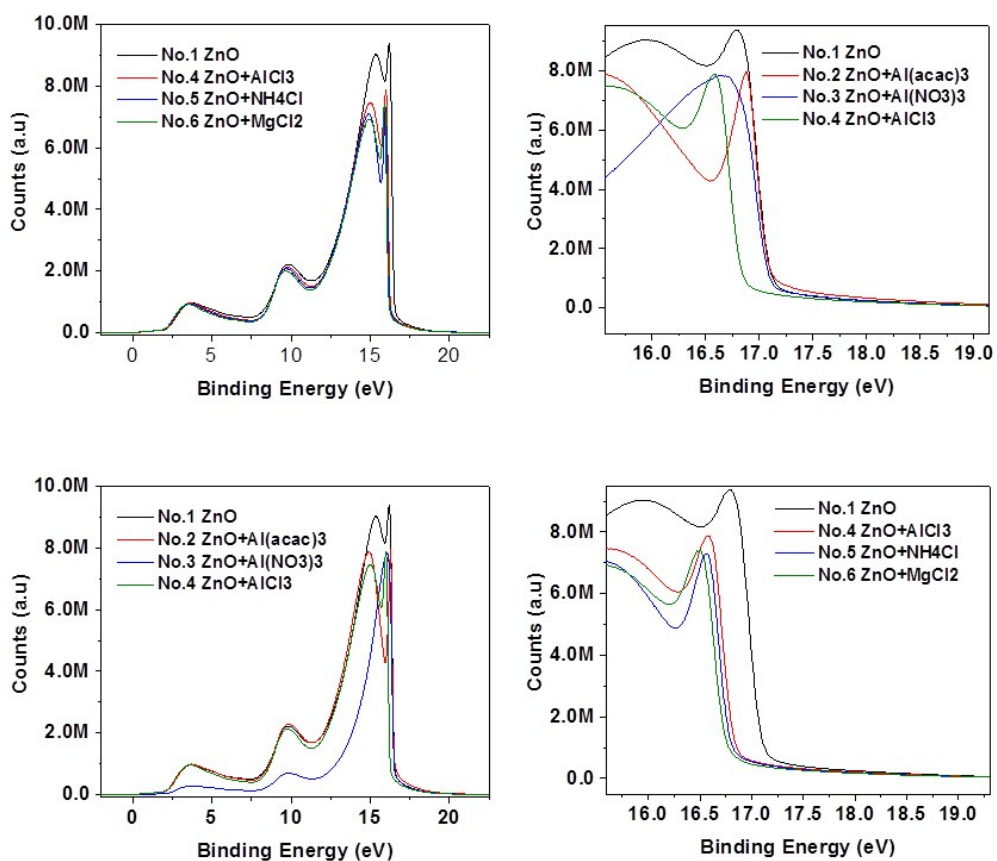

**Figure S10:** UPS spectra of interlayer thin films (Au substrate as a standard, WF =5.2 eV).

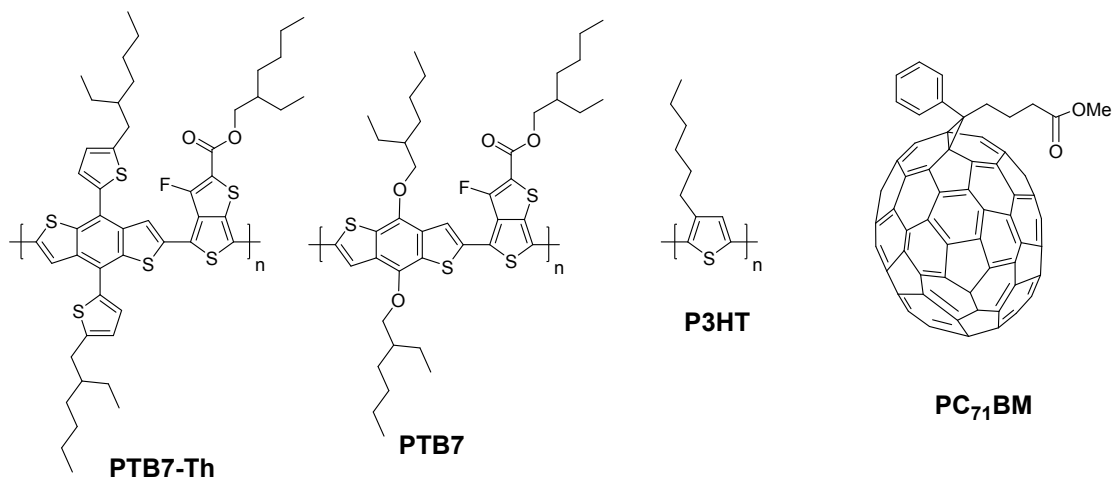

Figure S11. Polymer structures and PC<sub>71</sub>BM

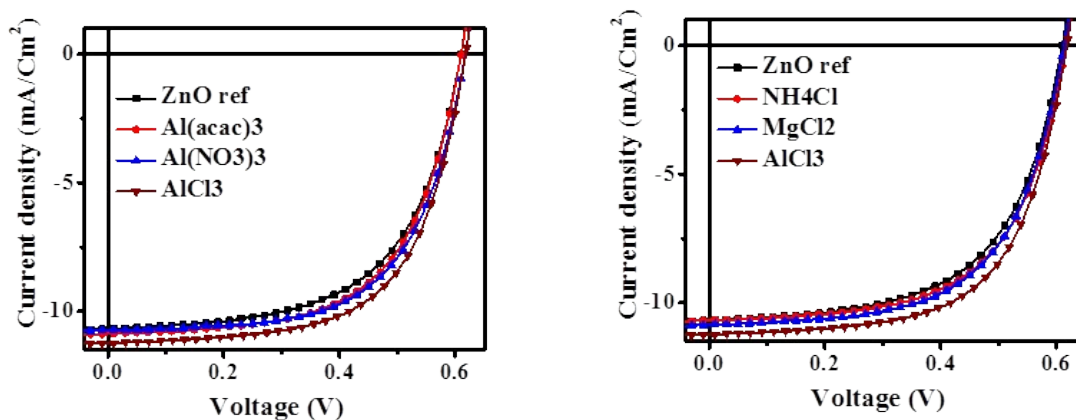

Figure S12. J-V curves of P3HT:PC<sub>71</sub>BM devices with different electron transporting layers.

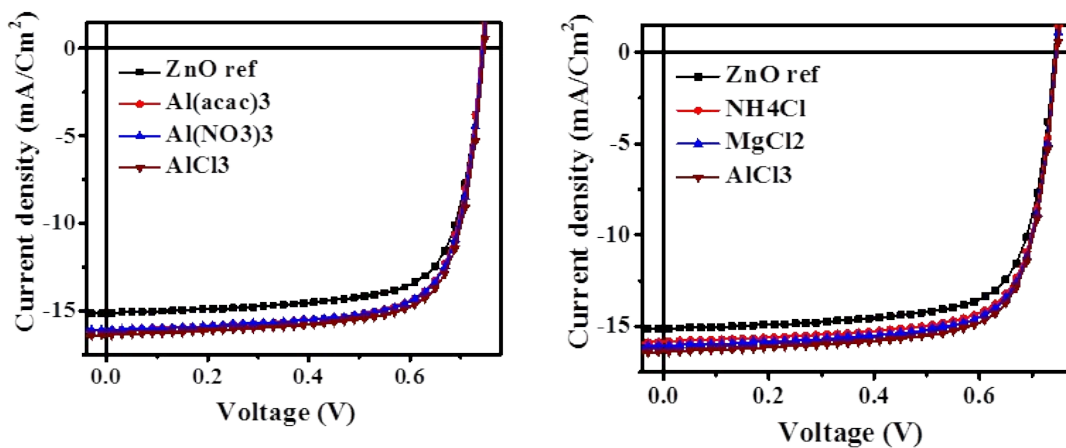

Figure S13. J-V curves of PTB7:PC<sub>71</sub>BM devices with different electron transporting layers.

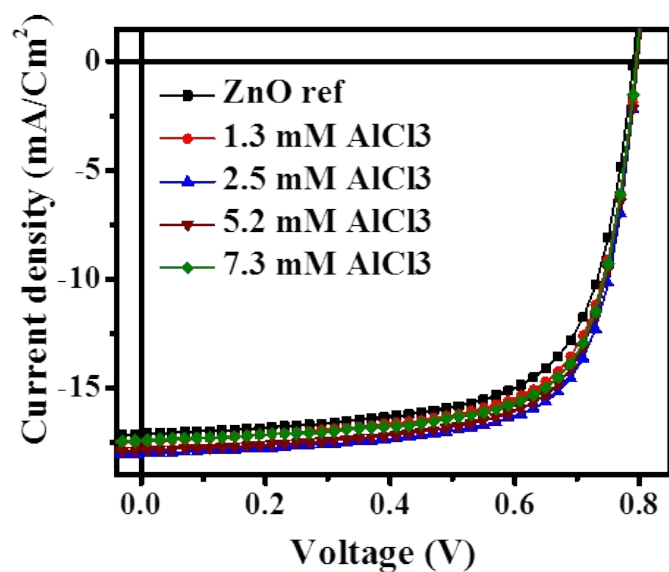

Figure S14. J-V curves of PTB7-Th:PC<sub>71</sub>BM devices with different AlCl<sub>3</sub> concentrations.

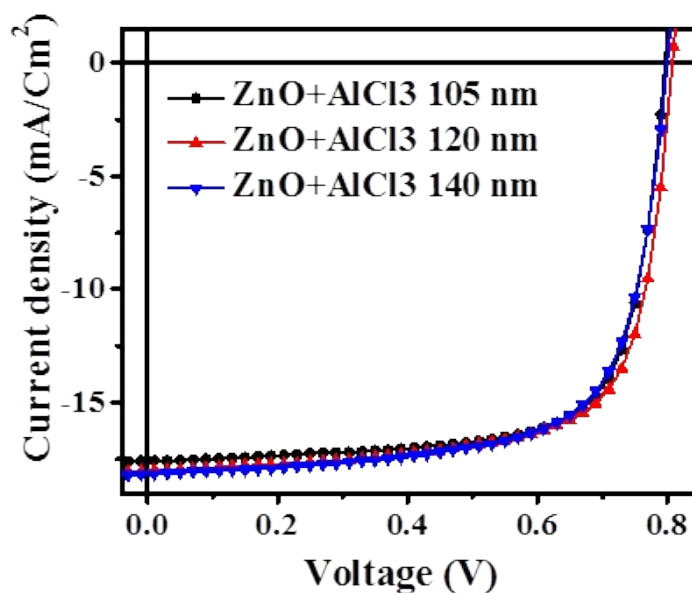

Figure S15. J-V curves of PTB7-Th:PC<sub>71</sub>BM devices with different active layer thicknesses. In these devices, the ZnO layer was doped with AlCl<sub>3</sub>.

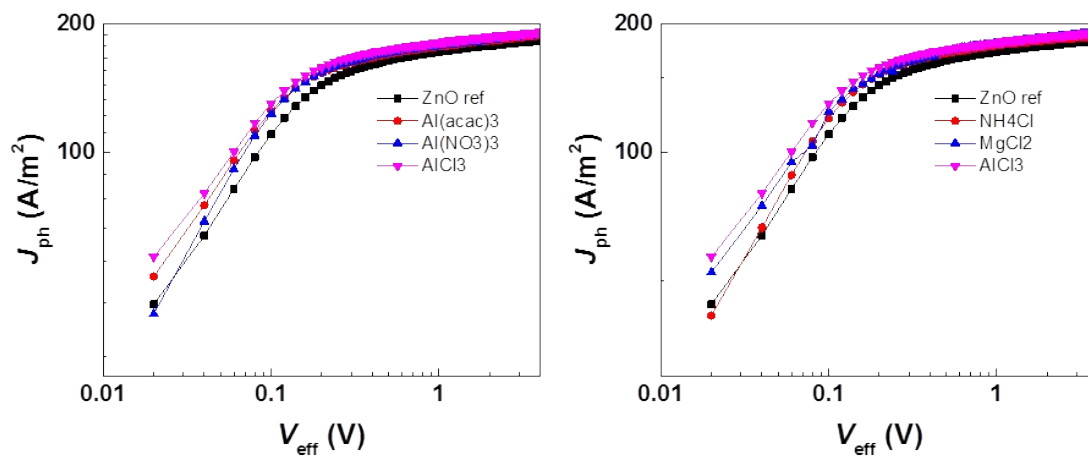

**Figure S16.** Photocurrents of PTB7-Th:PC<sub>71</sub>BM devices with different electron transporting layers.

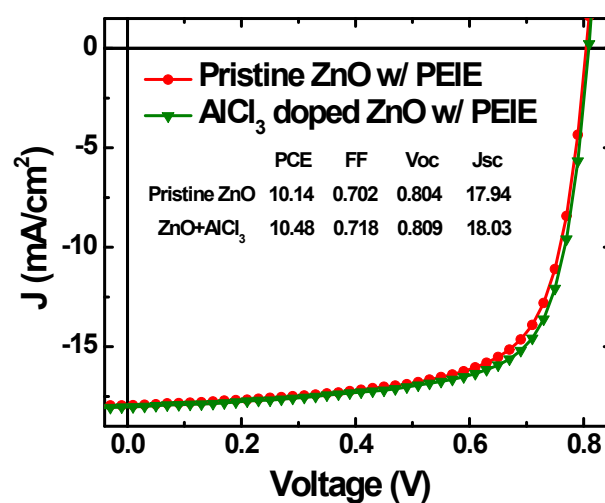

**Figure S17.** J-V curves of ZnO and AlCl<sub>3</sub>-doped ZnO devices with PEIE as a surface modification layer.



## SIPV (Sensor Integrated OPV) module

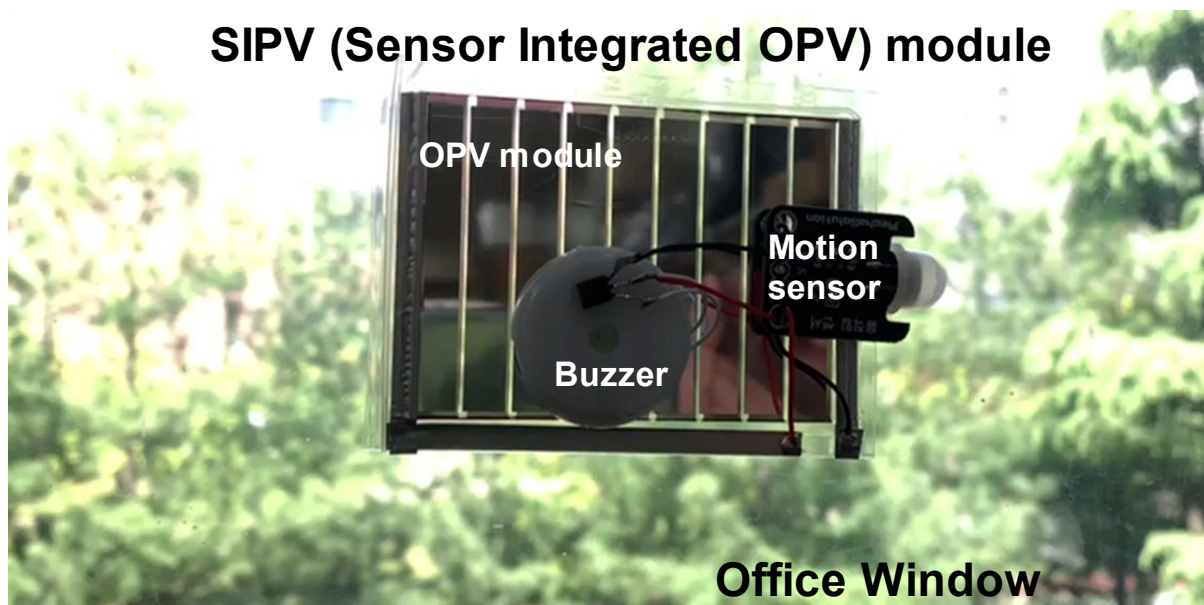

**Figure S18.** An organic solar module driven motion sensor device that includes an  $\text{AlCl}_3$ -doped ZnO ETL. An OPV module integrated with a motion sensor and buzzer is attached to the inside office window.

**Table S1.** Series resistances and shunt resistances are extracted from EIS fitting of PTB7-Th:PC<sub>71</sub>BM devices with different ETLs.

| Device                                | Rs (Ohm) | Rsh (Ohm) |
|---------------------------------------|----------|-----------|
| ZnO                                   | 10.4     | 28780     |
| ZnO+Al(acac) <sub>3</sub>             | 8.2      | 49990     |
| ZnO+Al(NO <sub>3</sub> ) <sub>3</sub> | 6.2      | 29330     |
| ZnO+AlCl <sub>3</sub>                 | 3.9      | 9080      |
| ZnO+NH <sub>4</sub> Cl                | 6.7      | 14510     |
| ZnO+MgCl <sub>2</sub>                 | 6.5      | 10360     |

**Table S2.** Photovoltaic performances of P3HT:PC<sub>71</sub>BM devices with different electron transporting layers.

| Device                                | PCE best (%)             | F.F   | Voc (V) | Jsc (mA/Cm <sup>2</sup> ) |
|---------------------------------------|--------------------------|-------|---------|---------------------------|
| Reference                             | 3.84 (3.54) <sup>a</sup> | 0.589 | 0.609   | 10.68                     |
| ZnO+Al(acac) <sub>3</sub>             | 4.00 (3.71)              | 0.602 | 0.610   | 10.87                     |
| ZnO+Al(NO <sub>3</sub> ) <sub>3</sub> | 4.07 (3.85)              | 0.614 | 0.617   | 10.74                     |
| ZnO+AlCl <sub>3</sub>                 | 4.23 (4.02)              | 0.619 | 0.617   | 11.23                     |
| ZnO+NH <sub>4</sub> Cl                | 3.97 (3.71)              | 0.604 | 0.615   | 10.67                     |
| ZnO+MgCl <sub>2</sub>                 | 4.02 (3.81)              | 0.604 | 0.612   | 10.86                     |

<sup>a</sup> The average PCE from more than 8 devices.

**Table S3.** Photovoltaic performances of PTB7:PC<sub>71</sub>BM devices with different electron transporting layers.

| Device                                | PCE best (%)             | F.F   | Voc (V) | Jsc (mA/Cm <sup>2</sup> ) |
|---------------------------------------|--------------------------|-------|---------|---------------------------|
| Reference                             | 8.19 (7.78) <sup>a</sup> | 0.729 | 0.742   | 15.13                     |
| ZnO+Al(acac) <sub>3</sub>             | 8.74 (8.49)              | 0.731 | 0.741   | 16.11                     |
| ZnO+Al(NO <sub>3</sub> ) <sub>3</sub> | 8.79 (8.58)              | 0.733 | 0.744   | 16.08                     |
| ZnO+AlCl <sub>3</sub>                 | 9.01(8.85)               | 0.735 | 0.748   | 16.39                     |
| ZnO+NH <sub>4</sub> Cl                | 8.68 (8.48)              | 0.735 | 0.745   | 15.82                     |
| ZnO+MgCl <sub>2</sub>                 | 8.82 (8.57)              | 0.735 | 0.746   | 16.07                     |

<sup>a</sup> The average PCE from more than 8 devices.**Table S4.** Photovoltaic performances of devices with different AlCl<sub>3</sub> concentrations in AlCl<sub>3</sub>-doped ZnO.

| Device                             | PCE (%) | F.F  | Voc (V) | Jsc (mA/Cm <sup>2</sup> ) |
|------------------------------------|---------|------|---------|---------------------------|
| Reference                          | 9.16    | 0.68 | 0.79    | 17.10                     |
| 0.5M ZnO+ 1.3 mM AlCl <sub>3</sub> | 9.56    | 0.69 | 0.80    | 17.45                     |
| 0.5M ZnO+ 2.5 mM AlCl <sub>3</sub> | 10.16   | 0.71 | 0.80    | 18.00                     |
| 0.5M ZnO+ 5.2 mM AlCl <sub>3</sub> | 9.95    | 0.70 | 0.80    | 17.86                     |
| 0.5M ZnO+ 7.3 mM AlCl <sub>3</sub> | 9.72    | 0.70 | 0.79    | 17.42                     |

**Table S5.** Photovoltaic performances of state of the art organic solar cells with various ETL having PTB7-Th:PC<sub>70</sub>BM active layer.

| Device                      | PCE best (%) | F.F  | Voc (V) | Jsc (mA/cm <sup>2</sup> ) | Ref.      |
|-----------------------------|--------------|------|---------|---------------------------|-----------|
| ZnO                         | 7.48         | 0.58 | 0.74    | 15.66                     | [1]       |
| ZnO/PEI                     | 9.67         | 0.68 | 0.79    | 16.52                     |           |
| ZnO                         | 8.81         | 0.63 | 0.79    | 17.23                     | [2]       |
| ZnO/PEOz                    | 9.57         | 0.68 | 0.80    | 18.10                     |           |
| ZnO                         | 9.50         | 0.67 | 0.78    | 17.50                     | [3]       |
| ZnO/PFS-FTEG                | 10.60        | 0.72 | 0.80    | 18.30                     |           |
| ZnO/PFS-FC                  | 10.10        | 0.69 | 0.80    | 18.00                     |           |
| TiO <sub>2</sub>            | 9.49         | 0.69 | 0.79    | 17.25                     | [4]       |
| PEI                         | 9.62         | 0.67 | 0.77    | 18.57                     |           |
| PFN-OX                      | 9.44         | 0.66 | 0.78    | 18.11                     |           |
| TiO <sub>2</sub> /PEI       | 10.06        | 0.71 | 0.81    | 17.20                     |           |
| PEI/TiO <sub>2</sub>        | 10.30        | 0.71 | 0.81    | 17.64                     |           |
| ZnO                         | 9.16         | 0.67 | 0.79    | 17.10                     | This work |
| ZnO+AlCl <sub>3</sub>       | 10.38        | 0.71 | 0.80    | 18.01                     |           |
| ZnO/PEIE                    | 10.14        | 0.70 | 0.80    | 17.94                     |           |
| ZnO+AlCl <sub>3</sub> /PEIE | 10.48        | 0.71 | 0.80    | 18.03                     |           |

**Reference:**

- [1] C. Wang, C. Li, R. C. I. Mackenzie, S. Wen, Y. Liu, P. Ma, G. Wang, W. Tian and S. Ruan, *J. Mater. Chem. A*, 2018, 6, 17662–17670.
- [2] S. Nam, J. Seo, S. Woo, W. H. Kim, H. Kim, D. D. C. Bradley and Y. Kim, *Nat. Commun.*, 2015, 6, 8929.
- [3] J. Subbiah, V. D. Mitchell, N. K. C. Hui, D. J. Jones and W. W. H. Wong, *Angew. Chem. Int. Ed.*, 2017, 56, 8431–8434.
- [4] Y. Yan, F. Cai, L. Yang, W. Li, Y. Gong, J. Cai, S. Liu, R. S. Gurney, D. Liu and T. Wang, *ACS Appl. Mater. Interfaces*, 2017, 9, 32678–32687.
